# Supplementary material for: An injectable and biodegradable nano-photothermal DNA hydrogel enhances penetration and efficacy of tumor therapy
Source: Royal Society of Chemistry journal article supplement (doi:10.1039/d1bm00568e), 2021-01-01
Supplement: d1bm00568e4.pdf [file d1bm00568e4.pdf]

Supporting Information for

## **Injectable and Biodegradable Nano Photothermal DNA Hydrogel**

### **Enhances Penetration and Efficacy of Tumor Therapy**

Liping Zhou<sup>1,†</sup>, Wei Pi<sup>2,†</sup>, Mingda Hao<sup>1,†</sup>, Yansheng Li<sup>3</sup>, Heng An<sup>1</sup>, Qicheng Li<sup>2</sup>,  
Peixun Zhang<sup>2,\*</sup>, and Yongqiang Wen<sup>1,\*</sup>

<sup>1</sup> Beijing Key Laboratory for Bioengineering and Sensing Technology, School of Chemistry and Biological Engineering, University of Science and Technology Beijing, Beijing China 100083.

<sup>2</sup> Department of Orthopaedics and Trauma, Peking University People's Hospital, Beijing China 100044.

<sup>3</sup> Beijing Key Laboratory for Sensors, Beijing Information Science & Technology University, Beijing 100192, China.

† These three authors contributed equally to this work.

**\*Corresponding Author.**

*E-mail address:* [zhangpeixun@bjmu.edu.cn](mailto:zhangpeixun@bjmu.edu.cn) (Peixun Zhang) [wyq\\_wen@ustb.edu.cn](mailto:wyq_wen@ustb.edu.cn)

(Yongqiang Wen)

## Supplementary Tables and Figures

SI Fig. 1

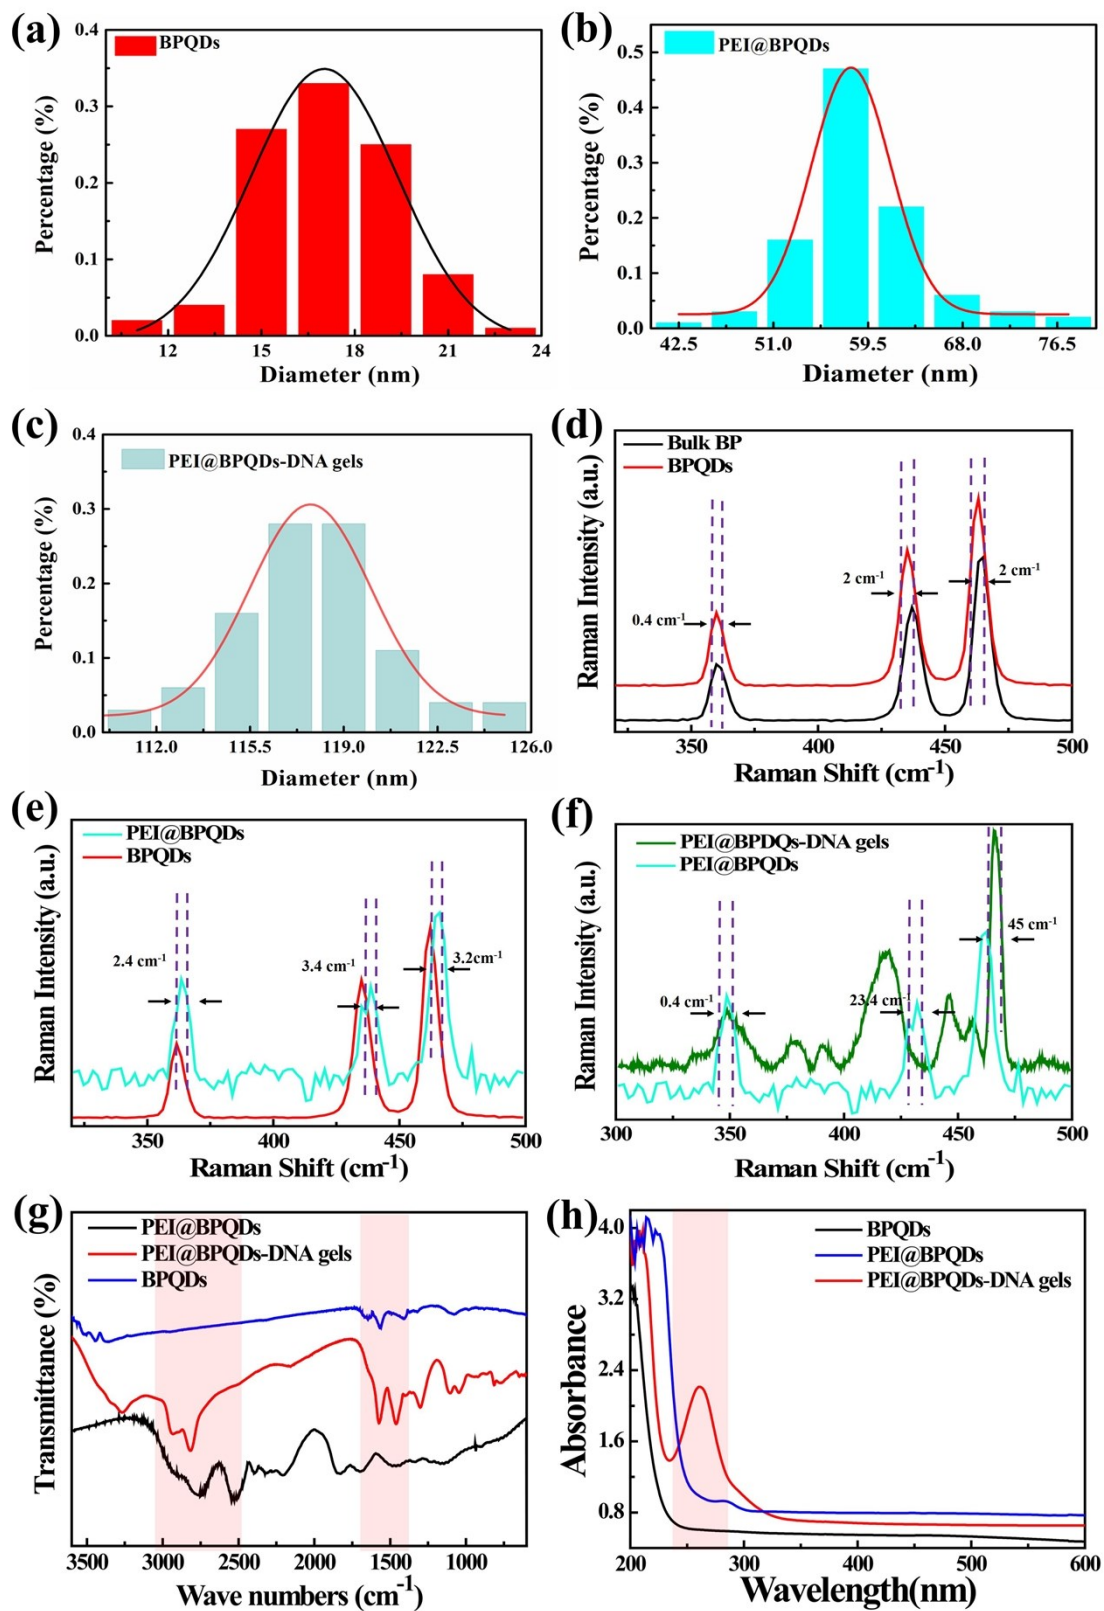

**Fig. S1** The physical properties of the BPQD nanoparticles. **a** The size of the BPQD nanoparticles. **b** The Raman spectra different sizes of PEI@BPQDs (55 – 60 nm). **c** The Raman spectra and size of microcosmic PEI@BPQDs-DNA particle (110 – 120 nm) are 110 – 120 nm and shows the of PEI@BPQDs. **d** The FTIR spectra of the PEI@BPQDs. **e** The UV spectra of PEI@BPQDs. **f** The absorbance potential of the nano materials under irradiation of different wavelength.

SI Fig. 2

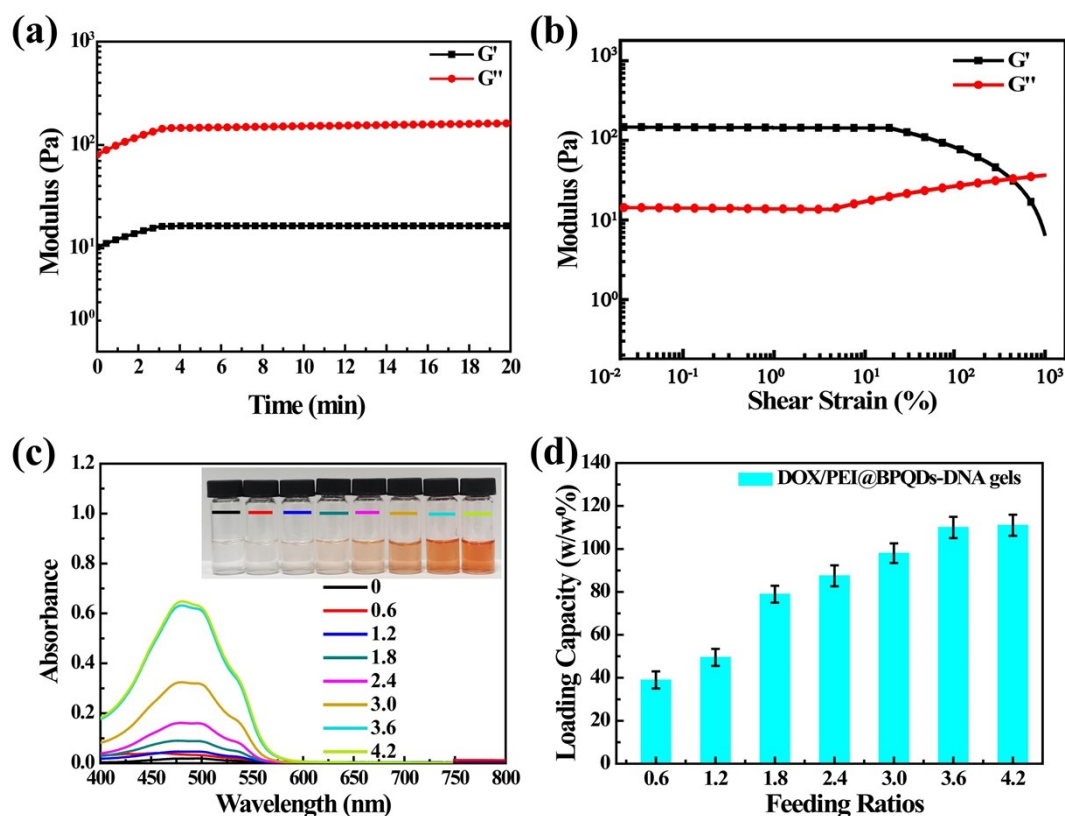

SI Fig. 2 **a** Storage modulus ( $G'$ ) and loss modulus ( $G''$ ) as functions of time for PEI@BPQDs-DNA gels. **b** Representative strain sweep with  $G'$  and  $G''$  shows the shear yield of dynamic-hydrogel with increasing strain. **c** Viscosity measurement of the PEI@BPQDs-DNA gels. **e** UV-vis-NIR spectra of PEI@BPQDs-DNA gels at different DOX/PEI@BPQDs-DNA gels feeding ratios after the removal of excess free DOX. **f** DOX loading capacities on PEI@BPQDs-DNA gels (w/w%) with increasing DOX/PEI@BPQDs-DNA gels feeding ratios.

SI Fig. 3

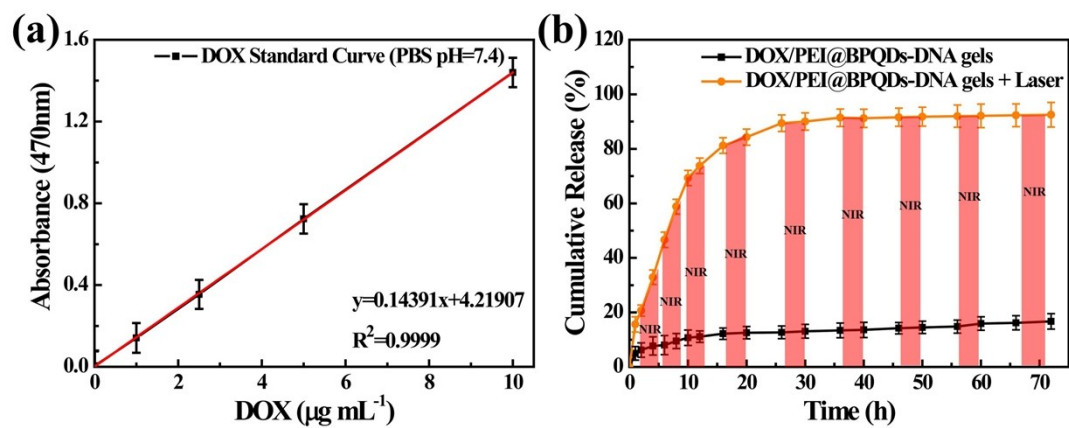

SI Fig. 3 **a** Schematic diagram illustrating DOX standard curve in the PBS. **b** Schematic diagram illustrating release DOX at 808 nm laser ( $0.5 \text{ W cm}^{-2}$ ) in real time.

SI Fig. 4

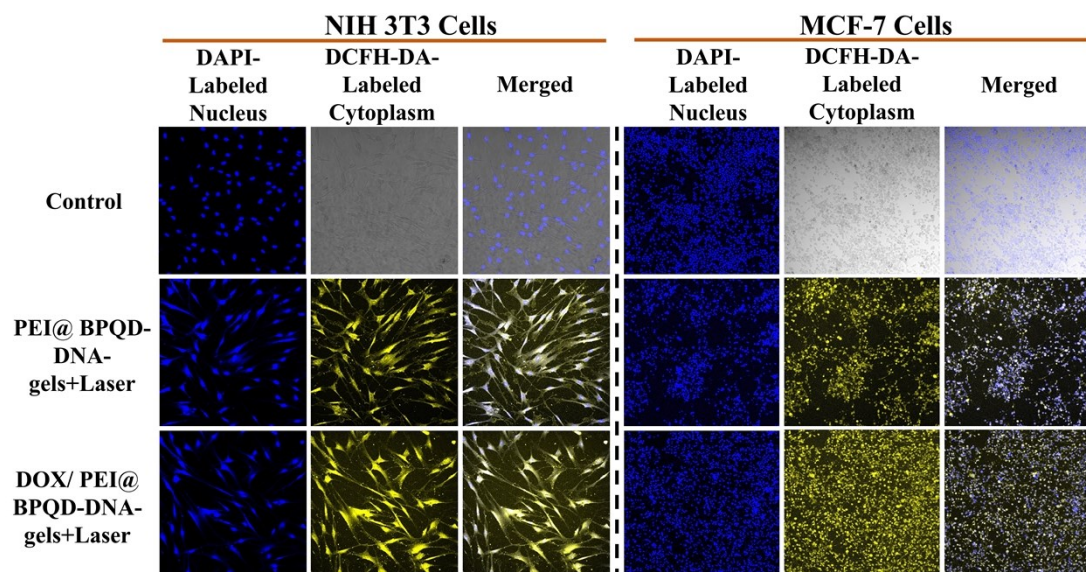

SI Fig. 4 Schematic diagram illustrating NIH 3T3 and MCF-7 cell of ROS was detected using H<sub>2</sub>DCFH-DA as ROS probe.

SI Fig. 5

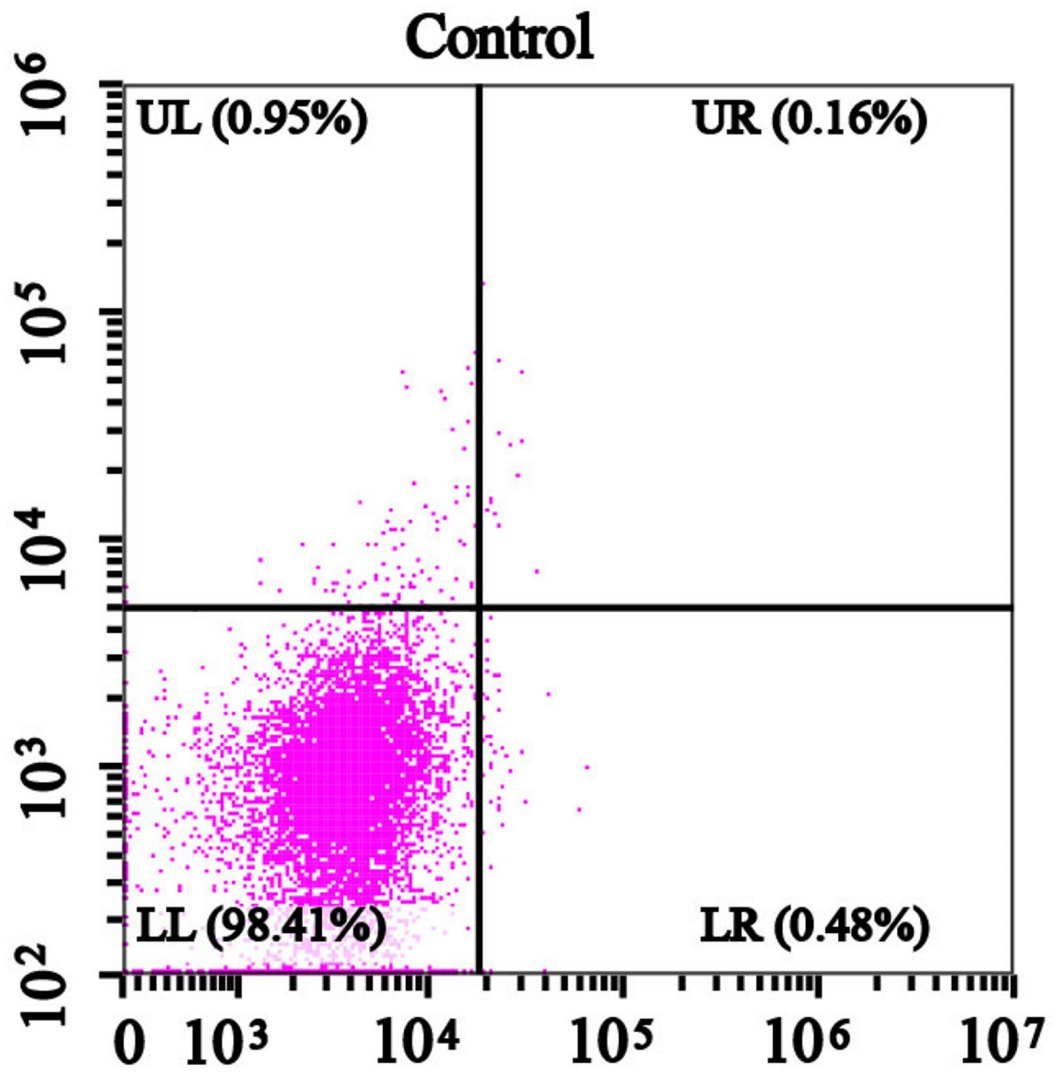

SI Fig. 5 Schematic diagram illustrating control of cell apoptosis was detected using

Annexin V-PE/7AAD kit.

SI Fig. 6

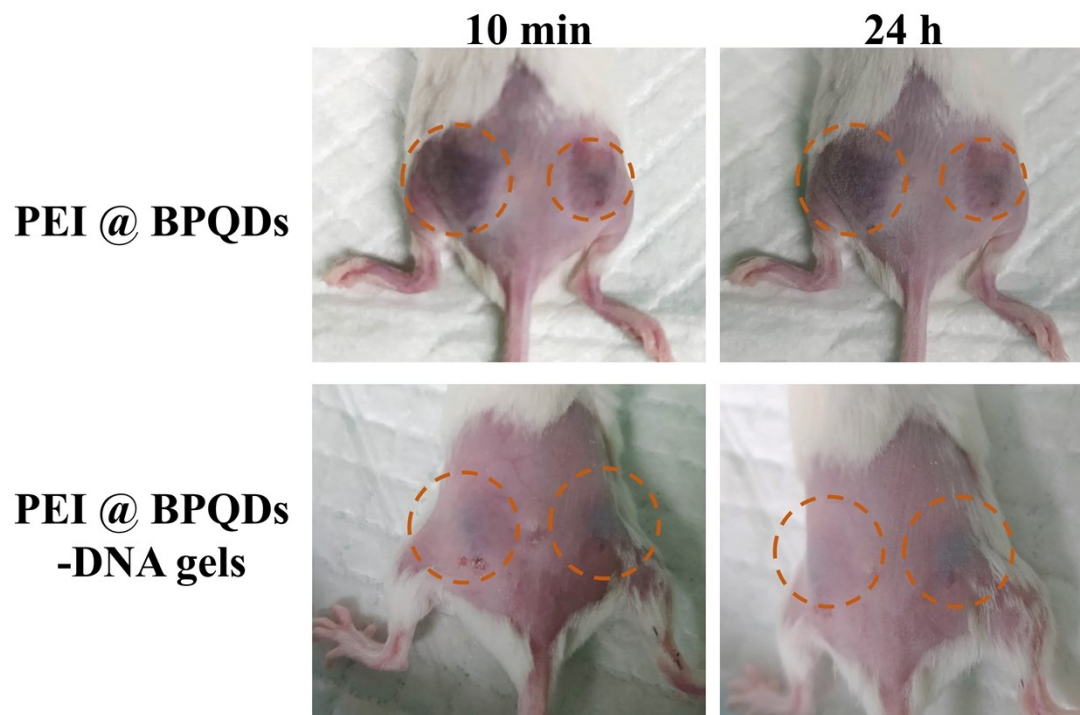

SI Fig. 6 Schematic diagram illustrating PEI@BPQDs-DNA gels injections and stability



SI Fig. 7

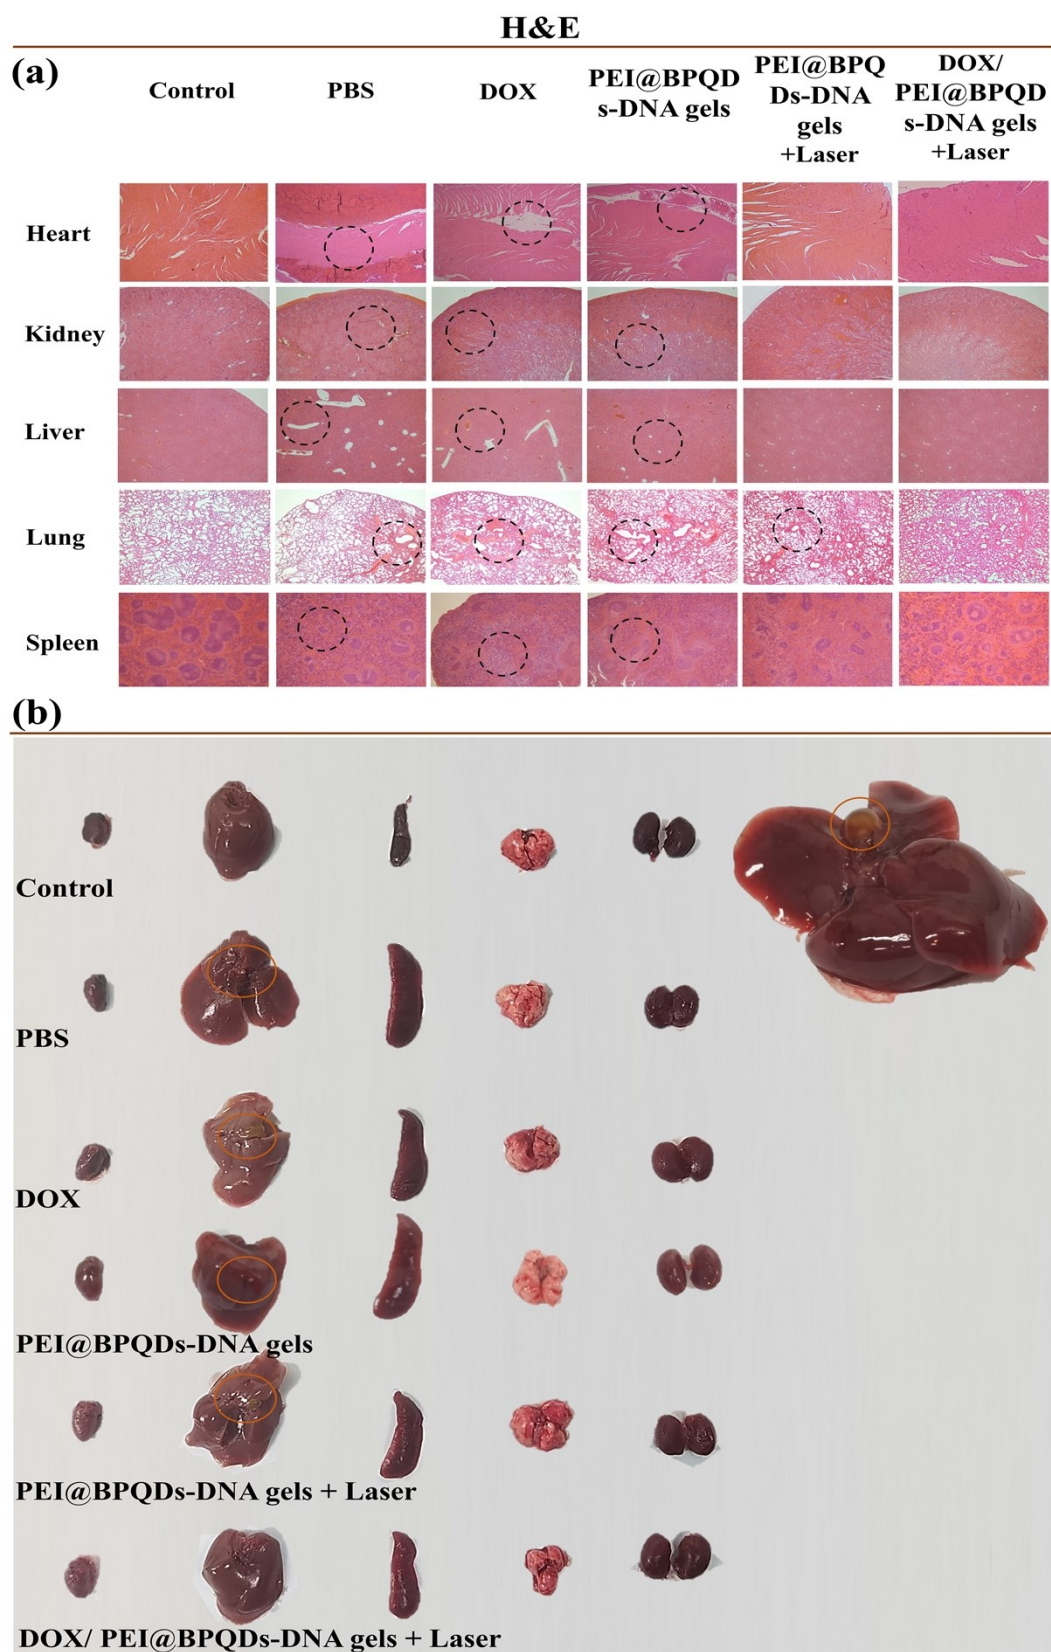

SI Fig. 7 a Schematic diagram illustrating the vital organs of the mice were acquired

and stained with H&E. **b** Schematic diagram illustrating diagrams of various organs.

## Tables

**Table S1.** Sequence of X-DNA<sup>a</sup>

| Strand          | End segment                         | Main body segment                           |
|-----------------|-------------------------------------|---------------------------------------------|
| X <sub>01</sub> | 5'-p-ACGT <sup>a</sup>              | ACGTCGACCGATGAATAGCGGTCAGATCCGTACCTACTCG-3' |
| X <sub>02</sub> | 5'-p-ACGT                           | ACGTCGAGTAGGTACGGATCTGCGTATTGCGAACGACTCG-3' |
| X <sub>03</sub> | 5'-p-ACGT                           | ACGTCGAGTCGTTGCAATACGGCTGTACGTATGGTCTCG-3'  |
| X <sub>04</sub> | 5'-p-(GT) <sub>4</sub> <sup>b</sup> | CGAGACCATACGTACAGCACCGCTATTCATCGGTCG-3'     |

<sup>a</sup> 5'-p represents the phosphorylated 5' end of oligonucleotide.

<sup>b</sup> GT=K represents the degenerate primer.

**Table S2.** PCR Oligonucleotide Hybridizations Protocol

| Cycle number | Denaturation  | First annealing | Cooling incubation | Second annealing |
|--------------|---------------|-----------------|--------------------|------------------|
| 1            | 95 °C (2 min) |                 | 65 °C (5 min)      |                  |
| 2            |               | 60 °C (2 min)   |                    |                  |
| 3            |               |                 |                    | 60 °C (0.5 min)  |

## **AUTHOR INFORMATION**

### **\*Corresponding Author**

**Yongqiang Wen** - *Beijing Key Laboratory for Bioengineering and Sensing Technology, Daxing Research Institute, School of Chemistry & Biological Engineering, University of Science & Technology Beijing, Beijing 100083, China; ORCID: 0000-0002-9687-8517;*

Email: [wyq\\_wen@ustb.edu.cn](mailto:wyq_wen@ustb.edu.cn)

**Peixun Zhang** - *Department of Orthopaedics and Trauma, Peking University People's Hospital, Beijing China 100044; ORCID: 0000-0001-7200-2281;*

E-mail: [zhangpeixun@bjmu.edu.cn](mailto:zhangpeixun@bjmu.edu.cn)

### **Authors**

**Liping Zhou** - *Beijing Key Laboratory for Bioengineering and Sensing Technology, Daxing Research Institute, School of Chemistry & Biological Engineering, University of Science & Technology Beijing, Beijing 100083, China; ORCID: 0000-0003-1059-225X*

**Wei Pi** - *Department of Orthopaedics and Trauma, Peking University People's Hospital, Beijing China 100044; ORCID: 0000-0001-5964-2460*

**Mingda Hao** - *Beijing Key Laboratory for Bioengineering and Sensing Technology, Daxing Research Institute, School of Chemistry & Biological Engineering, University of Science & Technology Beijing, Beijing 100083, China; ORCID: 0000-0002-2170-933X*

**Yansheng Li** - *Beijing Key Laboratory for Sensors, Beijing Information Science &*

Technology University, Beijing 100192, China. ORCID: 0000-0002-1242-7584

**Heng An** - *Beijing Key Laboratory for Bioengineering and Sensing Technology, Daxing Research Institute, School of Chemistry & Biological Engineering, University of Science & Technology Beijing, Beijing 100083, China; ORCID: 0000-0001-8805-4465*

**Qicheng Li** - *Department of Orthopaedics and Trauma, Peking University People's Hospital, Beijing China 100044; ORCID: 0000-0002-7967-4854*

### **Author Contributions**

L.P. Z., W.P., and M.D.H. share co-first authorship. L.P.Z., W.P., and M.D.H. designed the experiments and coordinated the work; L.P.Z., Y.S.L., and H.A. integrated and refined the experimental date; L.P.Z., W.P., M.D.H. and Q.C.L. contributed to complete animal experiments; L.P.Z., W.P., M.D.H., Y.S.L., H.A., and Q.C.L. writing of the manuscript and in the preparation of the original draft. P.X.Z., and Y.Q.W. contributed to writing, reviewing, and editing of the manuscript. Y.Q.W. supervised.

### **Notes**

The authors declare no competing financial interest.

### **Acknowledgements**

This work was supported by the National Natural Science Foundation of China (21975019, 31771322, 31571235), Beijing Science Technology New Star Cross Subject (2018019), Beijing National Science Foundation (2172039, 7212121), the National Key Research and Development Program of China (2018YFD0401302, 2018YFB1105504) and the Fundamental Research Funds for the Central Universities

and University of Science and Technology Beijing (USTB).
